# Supplementary material
Source: publisher figshare collection journal article supplement (https://karger.figshare.com/articles/dataset/_/7334267)

## Supplementary Fig. 1: CLUSTALW result summary

### CLUSTAL 2.1 Multiple Sequence Alignments

```
Sequence type explicitly set to Protein
Sequence format is Pearson
Sequence 1: epor          115 aa
Sequence 2: ecoli         149 aa
Start of Pairwise alignments
Aligning...
```

```
Sequences (1:2) Aligned. Score: 11.3043
Guide tree file created:  [clustalw.dnd]
```

```
There are 1 groups
Start of Multiple Alignment
```

```
Aligning...
Group 1:                      Delayed
Alignment Score -30
```

```
CLUSTAL-Alignment file created  [clustalw.aln]
```

---

#### clustalw.aln

CLUSTAL 2.1 multiple sequence alignment

```
epor      -----ASLWP--QVGSCLLLLAGAAWAPPPNLPDPKFESKAALLAARGPE---ELL
ecoli      RGSHHHHHHSFTPSGTTGTTKLTVTEKCQVRVGDLTVAKTRGQLTDAAPIGPVTVQALG
              .*: *   .*: * :: . .   :*. .* ..: :  *. **      *

epor      CFTER--LEDLVCFWEEAASAGVGPGN----YSFSYQLEDEPWKLCRLHQAPTARGAVRF
ecoli      CDARQVALKADTDNFEQGKFFLISDNNRDKLYVNIRPTDNSAWTTDNGVFYKNDVGSWGG
              * ::: *: .  :*: .   :. .*      *       :...*. .   .  *:

epor      WCSLPTADTSSSFVPL-----
ecoli      IIGIYVDGQQTNTPPGNYTLTLTGGYWAK
              .: . . .: .*
```

---

#### clustalw.dnd

```
(epor:0.44348,ecoli:0.44348);
```

Supplementary Fig. 2: EPO interaction (Biogrid 3.4)

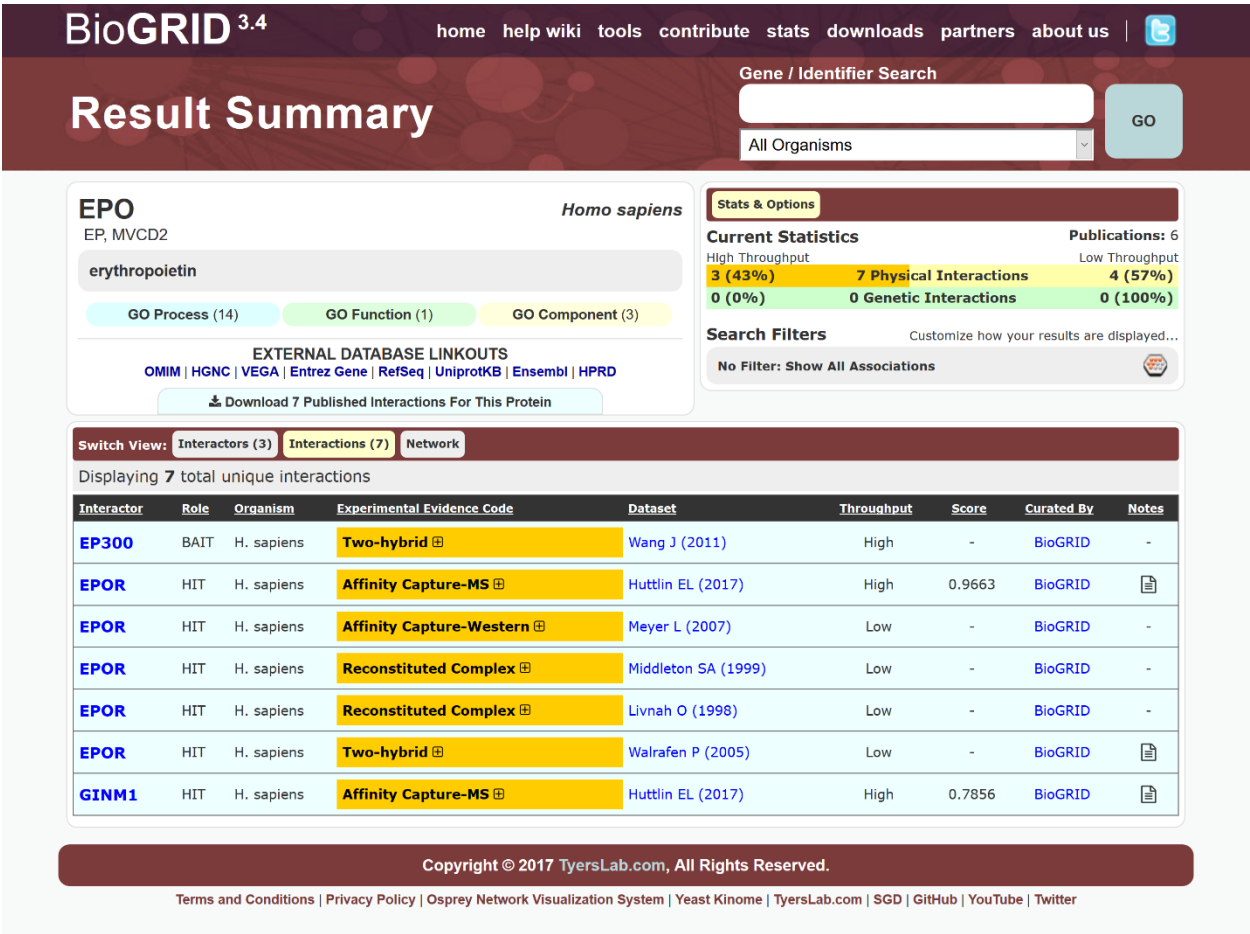

Supplementary Fig. 3: Rosetta Docking (EPO-adhesin)

X axis: RMSD score; Y axis: Interface score

Interface score I\_sc / RMSD and Top-10 "I\_sc score models"

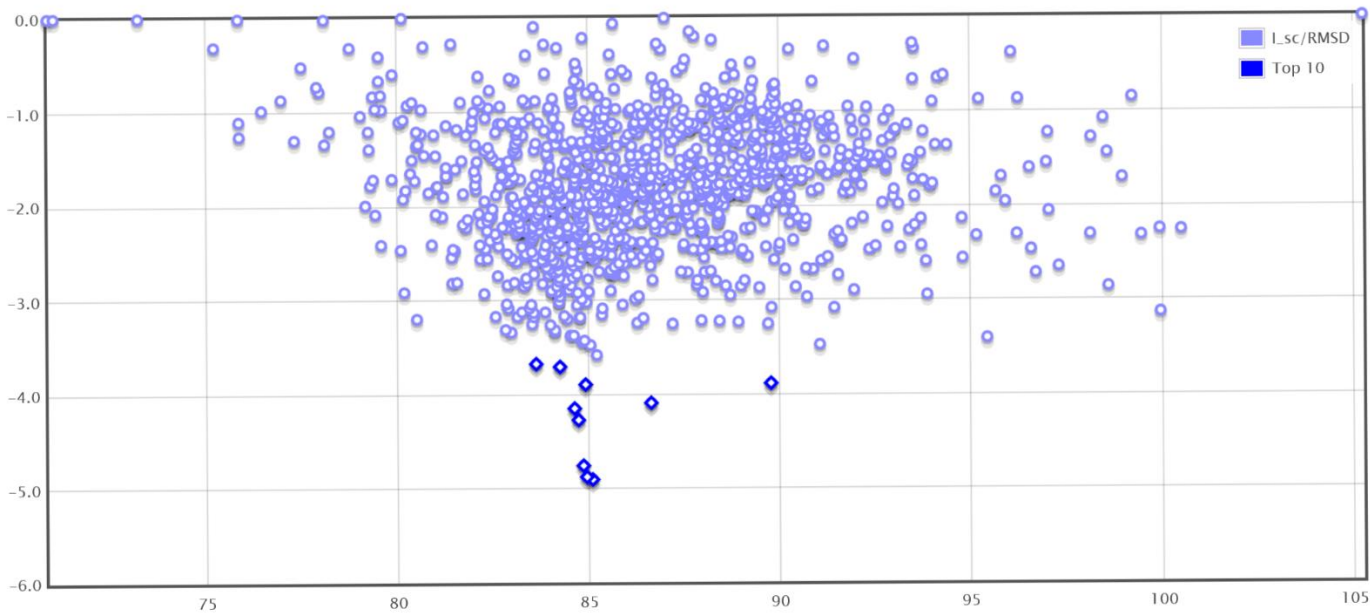

| Score data <a href="#">[Download original score file]</a> |               |        |      |        |       |         |             |             |             |             |
|-----------------------------------------------------------|---------------|--------|------|--------|-------|---------|-------------|-------------|-------------|-------------|
| decoy                                                     | total_score ↓ | rms    | Fnat | I_sc   | I_rms | cen_rms | dsif_ca_dih | dsif_cs_ang | dsif_ss_dih | dsif_ss_dst |
| <a href="#">proteins_0426</a>                             | -257.612      | 86.631 | NaN  | -4.096 | NaN   | 86.454  | 0.277       | 0.502       | 0.437       | -3.582      |
| <a href="#">proteins_0538</a>                             | -257.049      | 84.73  | NaN  | -4.275 | NaN   | 84.816  | 0.277       | 0.502       | 0.437       | -3.582      |
| <a href="#">proteins_0892</a>                             | -256.937      | 83.507 | NaN  | -3.048 | NaN   | 83.7    | 0.277       | 0.502       | 0.437       | -3.582      |
| <a href="#">proteins_0137</a>                             | -256.881      | 84.369 | NaN  | -3.169 | NaN   | 85.306  | 0.277       | 0.502       | 0.437       | -3.582      |
| <a href="#">proteins_0006</a>                             | -256.846      | 89.79  | NaN  | -3.083 | NaN   | 91.459  | 0.277       | 0.502       | 0.437       | -3.582      |
| <a href="#">proteins_0032</a>                             | -256.834      | 85.283 | NaN  | -2.698 | NaN   | 87.254  | 0.277       | 0.502       | 0.437       | -3.582      |
| <a href="#">proteins_0076</a>                             | -256.813      | 84.53  | NaN  | -3.378 | NaN   | 85.219  | 0.277       | 0.502       | 0.437       | -3.582      |
| <a href="#">proteins_0880</a>                             | -256.779      | 84.2   | NaN  | -2.917 | NaN   | 85.56   | 0.277       | 0.502       | 0.437       | -3.582      |
| <a href="#">proteins_0933</a>                             | -256.777      | 83.626 | NaN  | -3.678 | NaN   | 84.81   | 0.277       | 0.502       | 0.437       | -3.582      |
| <a href="#">proteins_0069</a>                             | -256.763      | 93.866 | NaN  | -2.95  | NaN   | 91.681  | 0.277       | 0.502       | 0.437       | -3.582      |
| <a href="#">proteins_0222</a>                             | -256.756      | 98.605 | NaN  | -2.863 | NaN   | 89.604  | 0.277       | 0.502       | 0.437       | -3.582      |
| <a href="#">proteins_0133</a>                             | -256.729      | 84.131 | NaN  | -3.32  | NaN   | 84.876  | 0.277       | 0.502       | 0.437       | -3.582      |
| <a href="#">proteins_0261</a>                             | -256.727      | 85.015 | NaN  | -2.912 | NaN   | 81.766  | 0.277       | 0.502       | 0.437       | -3.582      |
| <a href="#">proteins_0693</a>                             | -256.722      | 85.568 | NaN  | -2.718 | NaN   | 87.492  | 0.277       | 0.502       | 0.437       | -3.582      |
| <a href="#">proteins_0455</a>                             | -256.706      | 84.256 | NaN  | -2.963 | NaN   | 86.476  | 0.277       | 0.502       | 0.437       | -3.582      |
| <a href="#">proteins_0492</a>                             | -256.703      | 84.115 | NaN  | -3.335 | NaN   | 84.528  | 0.277       | 0.502       | 0.437       | -3.582      |
| <a href="#">proteins_0057</a>                             | -256.697      | 82.867 | NaN  | -3.041 | NaN   | 85.652  | 0.277       | 0.502       | 0.437       | -3.582      |
| <a href="#">proteins_0044</a>                             | -256.683      | 84.895 | NaN  | -3.431 | NaN   | 85.582  | 0.277       | 0.502       | 0.437       | -3.582      |
| <a href="#">proteins_0044</a>                             | -256.682      | 88.429 | NaN  | -3.226 | NaN   | 89.146  | 0.277       | 0.502       | 0.437       | -3.582      |
| <a href="#">proteins_0075</a>                             | -256.678      | 84.952 | NaN  | -3.024 | NaN   | 87.394  | 0.277       | 0.502       | 0.437       | -3.582      |

## Supplementary Fig. 4: Rosetta Docking (EPO-EPOR)

X axis: RMSD score; Y axis: Interface score

Interface score  $I_{sc}$  / RMSD and Top-10 " $I_{sc}$  score models"

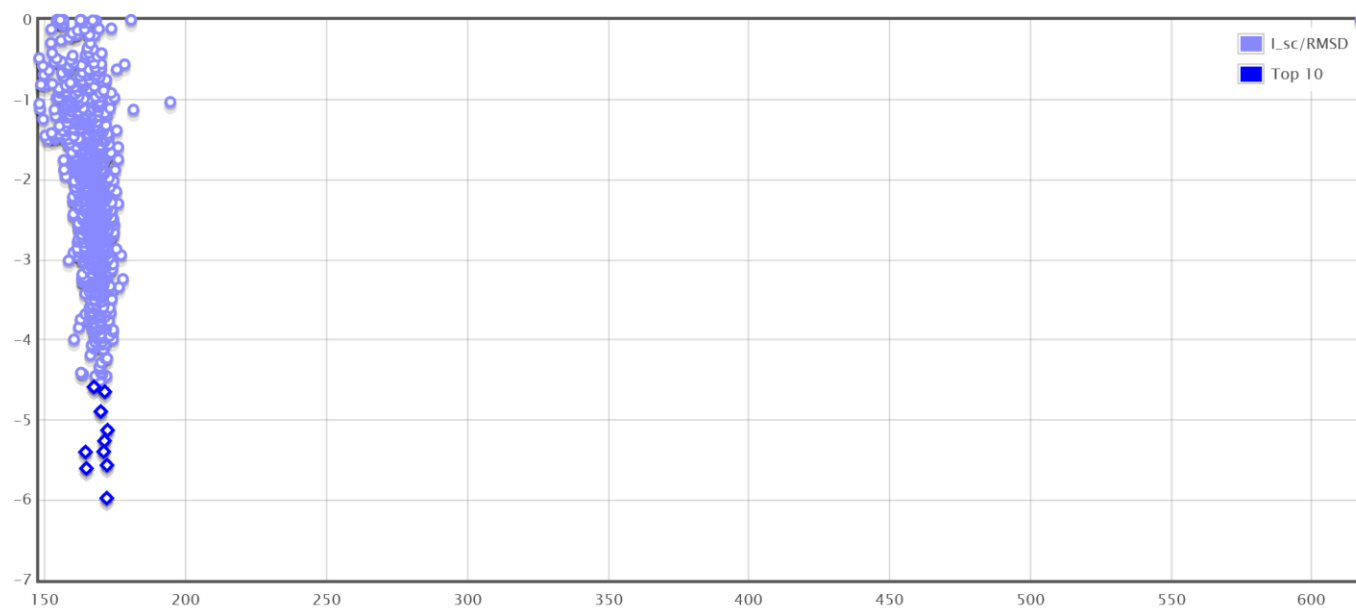

| Score data [ <a href="#">Download original score file</a> ] |             |         |      |          |      |         |             |             |             |            |
|-------------------------------------------------------------|-------------|---------|------|----------|------|---------|-------------|-------------|-------------|------------|
| decoy                                                       | total_score | rms     | Fnat | $I_{sc}$ | Irms | cen_rms | dsif_ca_dih | dsif_cs_ang | dsif_ss_dih | dsif_ss_ds |
| <a href="#">proteins_0753</a>                               | -313.739    | 167.341 | NaN  | -4.587   | NaN  | 167.798 | 0.592       | 0.62        | 3.101       | -7.149     |
| <a href="#">proteins_0057</a>                               | -313.729    | 166.567 | NaN  | -4.062   | NaN  | 165.967 | 0.592       | 0.62        | 3.101       | -7.149     |
| <a href="#">proteins_0574</a>                               | -313.676    | 169.694 | NaN  | -4.509   | NaN  | 169.815 | 0.592       | 0.62        | 3.101       | -7.149     |
| <a href="#">proteins_0084</a>                               | -313.596    | 164.649 | NaN  | -5.605   | NaN  | 166.77  | 0.592       | 0.62        | 3.101       | -7.149     |
| <a href="#">proteins_0111</a>                               | -313.582    | 171.083 | NaN  | -5.261   | NaN  | 172.455 | 0.592       | 0.62        | 3.101       | -7.149     |
| <a href="#">proteins_0677</a>                               | -313.568    | 160.25  | NaN  | -3.994   | NaN  | 162.246 | 0.592       | 0.62        | 3.101       | -7.149     |
| <a href="#">proteins_0242</a>                               | -313.442    | 171.97  | NaN  | -5.564   | NaN  | 171.597 | 0.592       | 0.62        | 3.101       | -7.149     |
| <a href="#">proteins_0016</a>                               | -313.441    | 164.109 | NaN  | -3.75    | NaN  | 166.264 | 0.592       | 0.62        | 3.101       | -7.149     |
| <a href="#">proteins_0603</a>                               | -313.4      | 164.322 | NaN  | -5.4     | NaN  | 166.749 | 0.592       | 0.62        | 3.101       | -7.149     |
| <a href="#">proteins_0112</a>                               | -313.382    | 171.883 | NaN  | -5.977   | NaN  | 172.884 | 0.592       | 0.62        | 3.101       | -7.149     |
| <a href="#">proteins_0144</a>                               | -313.36     | 165.876 | NaN  | -3.675   | NaN  | 167.824 | 0.592       | 0.62        | 3.101       | -7.149     |
| <a href="#">proteins_0028</a>                               | -313.35     | 163.413 | NaN  | -4.425   | NaN  | 166.082 | 0.592       | 0.62        | 3.101       | -7.149     |
| <a href="#">proteins_0319</a>                               | -313.315    | 170.506 | NaN  | -3.797   | NaN  | 171.308 | 0.592       | 0.62        | 3.101       | -7.149     |
| <a href="#">proteins_0244</a>                               | -313.314    | 167.975 | NaN  | -4.56    | NaN  | 168.546 | 0.592       | 0.62        | 3.101       | -7.149     |
| <a href="#">proteins_0522</a>                               | -313.27     | 162.746 | NaN  | -4.409   | NaN  | 165.699 | 0.592       | 0.62        | 3.101       | -7.149     |
| <a href="#">proteins_0412</a>                               | -313.125    | 167.234 | NaN  | -3.207   | NaN  | 168.792 | 0.592       | 0.62        | 3.101       | -7.149     |
| <a href="#">proteins_0133</a>                               | -313.074    | 167.285 | NaN  | -3.671   | NaN  | 167.103 | 0.592       | 0.62        | 3.101       | -7.149     |
| <a href="#">proteins_0004</a>                               | -313.025    | 172.64  | NaN  | -3.358   | NaN  | 171.083 | 0.592       | 0.62        | 3.101       | -7.149     |
| <a href="#">proteins_0517</a>                               | -313.009    | 167.458 | NaN  | -3.839   | NaN  | 169.141 | 0.592       | 0.62        | 3.101       | -7.149     |
| <a href="#">proteins_0905</a>                               | -312.991    | 166.077 | NaN  | -4.191   | NaN  | 167.079 | 0.592       | 0.62        | 3.101       | -7.149     |

Supplementary Fig. 5: Molecular Dynamics simulation between EPO and *E. coli* Adhesin

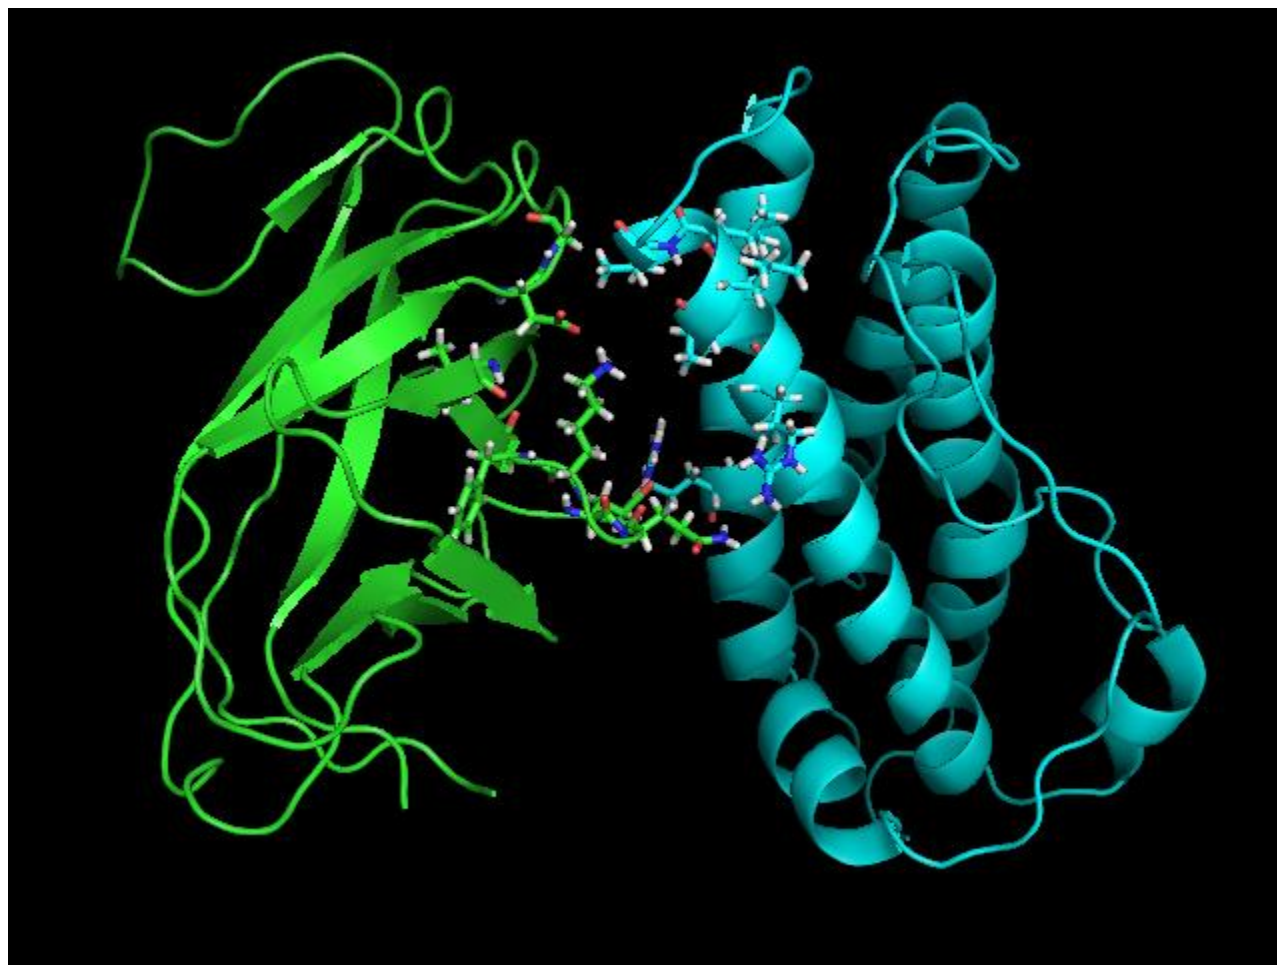

The png file of the complex structure after dynamics is attached. The green and cyan cartoons represent the EPO and adhesin, respectively. The interface residues in between the complex are represented in stick.

Supplementary Fig. 6: Growth curves of different bacteria in presence and absence of rhuEPO repeated 6 times.

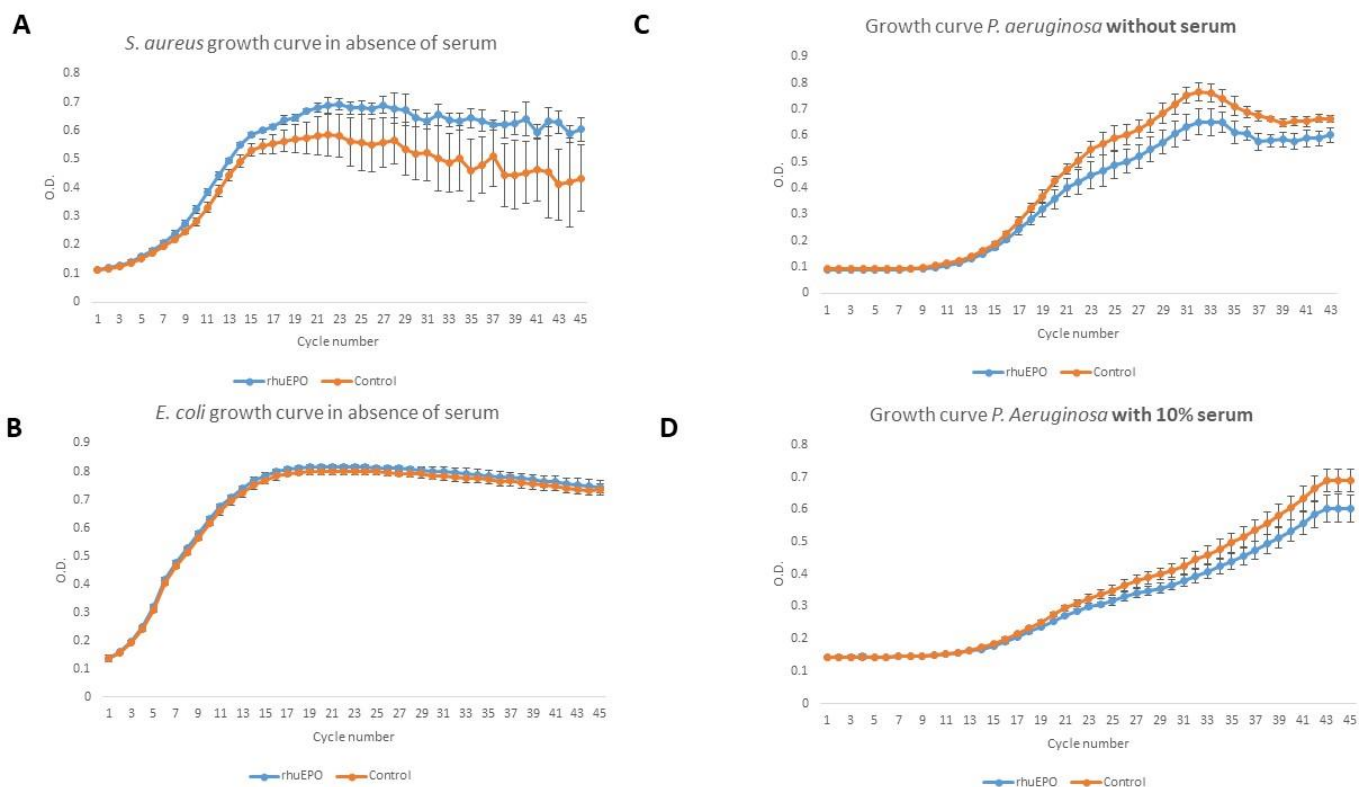

Growth curve of bacteria repeated 6 times are shown. The growth curve of *P. aeruginosa* in presence of 10% serum is also shown. Experiments of *S. aureus* and *E. coli* in presence of 10% serum in our experimental conditions did not yield any growth (data not shown).

Supplementary Fig. 7: Absorbance spectra of membrane protein at 280nm

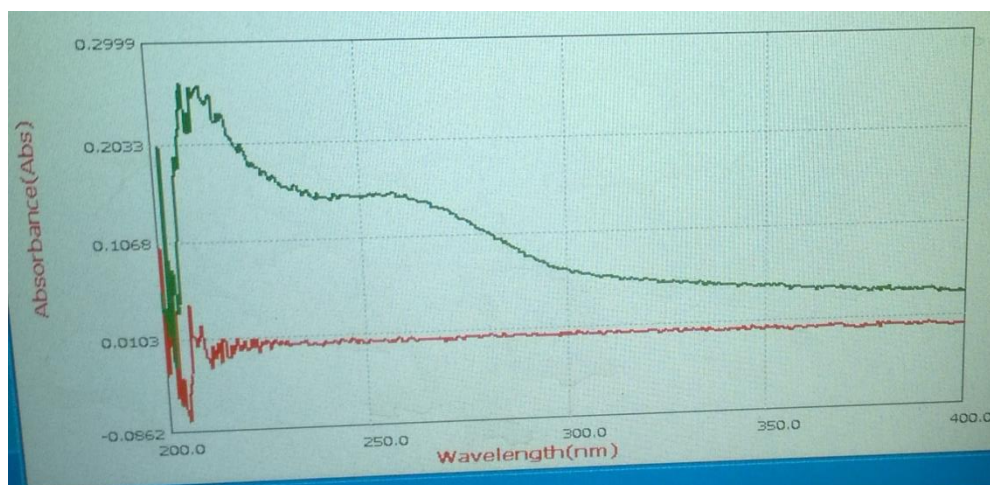



Supplementary Fig. 8: Fluorescence emission spectra of phosphate buffer (3ml) when excited at 240nm.

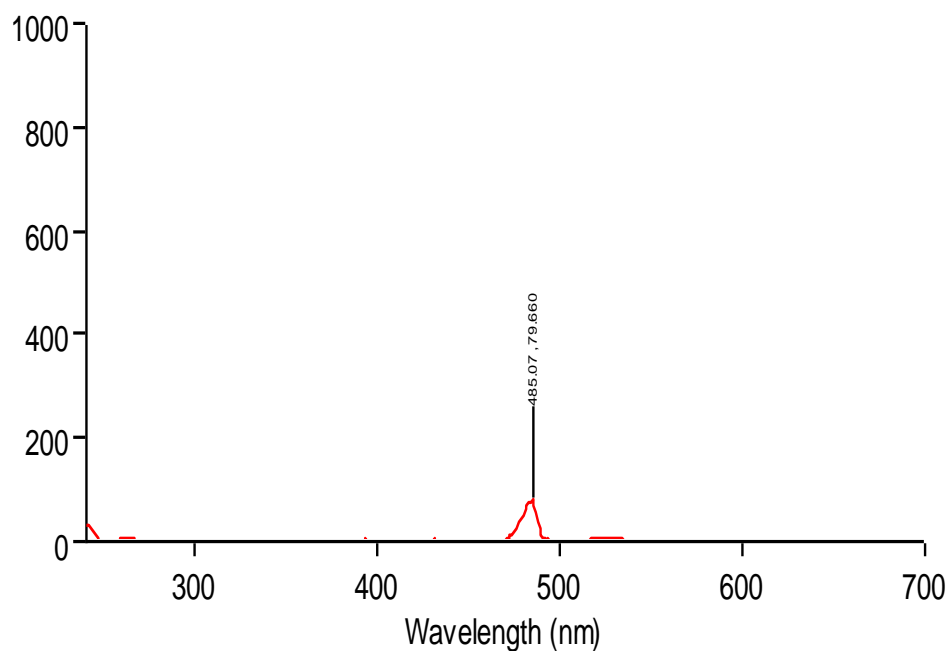

Supplementary Fig. 9: Fluorescence emission spectra of phosphate buffer after addition of membrane protein (0.025mg/3ml)

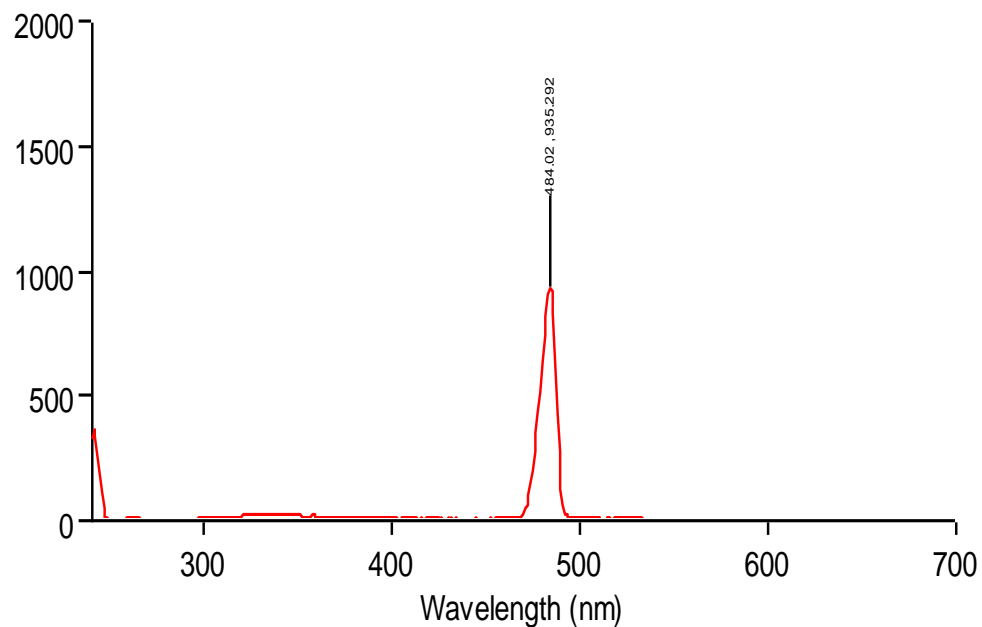

Supplement: Supplementary file 1 [file 1]
