# Supplementary material
Source: publisher figshare collection journal article supplement (https://karger.figshare.com/articles/dataset/_/7334267)
Supplement: Supplementary file 2 [file 1]

Table 1

Colony counts of *S. aureus* 3160 grown in presence and absence of rhuEPO.

Colony counts are shown when the bacteria are grown in absence of rhuEPO / control, which is marked as 0.5 McFarland, in presence of control and in presence of EPO. The difference of the test and control is statistically significant.

| No. of plates<br>(n) | 0.5<br>McFarland | Test (EPO)<br>(30IU/L) | Control        | p- value<br>(test vs. control) |
|----------------------|------------------|------------------------|----------------|--------------------------------|
| 6                    | 294.33 ± 130.76  | 269.83 ± 65.12         | 205.16 ± 15.68 | < 0.0001                       |

Table 2

Colony counts of *E. coli* 9492 grown in presence and absence of rhuEPO.

Colony counts are shown when the bacteria are grown in absence of rhuEPO / control, which is marked as 0.5 McFarland, in presence of control and in presence of rhuEPO. The difference of the test and control is statistically significant.

| No. of Plates<br>(n) | Colony Count     |                         |           | p-value<br>(test vs. control) |
|----------------------|------------------|-------------------------|-----------|-------------------------------|
|                      | 0.5<br>McFarland | Test (EPO)<br>(30 IU/L) | Control   |                               |
| 6                    | 22.66 ± 15.6     | 50 ± 17.53              | 24 ± 5.21 | 0.0059                        |

Table 3  
Colony

counts of *P. aeruginosa* 3542 grown in presence and absence of rhuEPO.

Colony counts are shown when the bacteria are grown in absence of rhuEPO / control, which is marked as 0.5 McFarland, in presence of control and in presence of EPO. The difference of the test and control is statistically significant.

| No. of Plates<br>(n) | Colony Count                 |                        |         | p-value<br>(test vs. control) |
|----------------------|------------------------------|------------------------|---------|-------------------------------|
|                      | 0.5<br>McFarland<br>(0.5 Mc) | Test(EPO)<br>(30 IU/L) | Control |                               |
| 6                    | 208.83 ± 35.9                | 72.5 ± 15.21           | TNTC    | <0.05                         |
